# Supplementary material for: Ultrathin carbon-coated FeS2 nanooctahedra for sodium storage with long cycling stability
Source: Royal Society of Chemistry journal article supplement (doi:10.1039/c8qi01144c), 2018-12-14
Supplement: c8qi01144c1.pdf [file c8qi01144c1.pdf]

## Electronic Supplementary Information

### Ultrathin Carbon-coated FeS<sub>2</sub> Nanooctahedra for Sodium Storage with Long Cycle Stability

#### Experimental Section

##### 1. Preparation of neat FeS<sub>2</sub> nanooctahedra

Typically, uniform FeS<sub>2</sub> nanooctahedra samples were prepared by a solvothermal reaction. Firstly, 1.05 g of polyvinyl pyrrolidone (PVP) and 0.556 g of FeSO<sub>4</sub>·4H<sub>2</sub>O were dissolved in 60 mL absolute ethylene glycol to get a transparent solution after stirring for 1h. Then 10 mL NaOH solution (1 M) and 0.4 g sublimed sulfur powder were respectively added to the solution and stirred continuously for 1h. Afterward, the as-obtained black solution was transferred into a 100 mL Teflon-lined scaled autoclave, sealed and heated at 180 °C for 12 h under pressure of approximately 2 MPa. Eventually the final product was centrifuged, washed by deionized water and absolute ethyl alcohol three times, respectively, and collected after drying at 110 °C for 10 h in a vacuum oven.

##### 2. Preparation of porous ultrathin carbon-coated FeS<sub>2</sub>@C nanooctahedra

In brief, 0.2 g of the as-synthesized FeS<sub>2</sub> nanooctahedra and 0.33 g of glucose were added into a 100 mL Teflon-lined scaled autoclave containing 60 mL deionized water and heated at 190 °C for 10 h under pressure of approximately 1.8 MPa. Similarly, the prepared composites were centrifuged, washed by deionized water and absolute ethyl alcohol three times, and then further dried in a vacuum oven at 110 °C for 10 h. Subsequently, before pickled by HCl (6 M) the composites were annealed at 500 °C in a N<sub>2</sub> flow for 45 min to obtain the ultimate product (FeS<sub>2</sub>@C) with porosity and enhanced conductivity.

CAUTION! Only professional and technical personnel or one who have accepted special training will be allowed to do autoclave experiments. Furthermore, before operating the experiment, please carefully check whether there are cracks and deformation in the autoclave. When autoclave experiment is scaled up, some safety precautions such as open and ventilated environment, temperature and pressure alarm apparatus, especially anti-explosion reactor should be taken into account.

## **Material characterization**

The morphologies and structures of the as-prepared samples were characterized by field emission scanning electron microscopy (FESEM, JEOL JSM-6490LV) images operated at 10 kV and transmission electron microscopy (TEM, JEOL JEM-2100) images and high-resolution TEM (HRTEM) images. The X-ray powder diffraction (XRD) patterns were examined on a Bruker D8 advance diffractometer with Cu K $\alpha$  radiation ( $\lambda = 0.15405$  nm). Raman spectra were recorded on a LabRAM HR Evolution Raman spectrometer system (HORIBA Scientific) with an excitation wavelength of 532 nm. Furthermore, the exact surface areas and pore size distribution of the samples were obtained on Belsorp-mini II (BEL Japan, Inc.) via the Brunauer-Emmett-Teller method from the N<sub>2</sub> adsorption-desorption isotherms which were collected at 77 K. The X-ray photoelectron spectroscopy (XPS) analysis was carried out on an ESCALAB 250Xi spectrometer (Thermo Scientific). Thermo-gravimetric (TG) analysis of the products was performed by Netzsch STA 449 F3 Jupiter analyzer in air flow at a heating rate of 5 °C/min. For ex situ SEM and TEM observation, the cell at fully charge state was disassembled in Ar-filled glove box. The electrode paste was repeatedly rinsed with diethylene glycol dimethyl ether solvent and vacuum-dried at 100 °C for 2 h. Afterward, the active materials were carefully made into corresponding samples, quickly moved into test platforms under protection of inert atmosphere. The samples were protected in the glove box with Ar atmosphere away from air and moisture.

## **Electrochemical measurements**

Electrochemical tests were conducted by self-assembled CR2032 coin-type cells with circulated Na foil disk and a glass fiber porous film as the counter electrode and separator, respectively. The working electrodes were constructed by mixing 90 wt% active material (FeS<sub>2</sub> nanooctahedras or FeS<sub>2</sub>@C octahedral nanocomposites), 5 wt% Super P and 5 wt% polyvinylidene difluoride (PVDF) dissolved in *N*-methylpyrrolidinone (NMP). After uniformly mixing, the homogeneous slurry was

smearred onto a copper foil of 14 mm diameter and dried at 110 °C for 10 h in vacuum oven. Then the films were pressed under a pressure of 5 MPa. The loading of the active material in the electrode was  $\sim 2.0 \text{ mg cm}^{-2}$ . The coin cells were assembled in a glove box filled with highly pure argon gas with moisture content and oxygen level below 1 ppm. The electrolyte solution was 1 M sodium trifluoromethanesulfonate ( $\text{NaSO}_3\text{CF}_3$ ) dissolved in diethylene glycol dimethyl ether (DEGDME). The galvanostatic tests were conducted on a battery testing system (Shenzhen Neware battery Co. Ltd, China) with the voltage range of 0.8–2.8 V (*vs.*  $\text{Na}^+/\text{Na}$ ) at room temperature (298 K). Cyclic voltammograms (CV) were cycled between 0.8–2.8 V at a scan rate of  $0.1 \text{ mV s}^{-1}$  and electrochemical impedance spectroscopy (EIS) was conducted on Autolab PGSTAT302N electrochemical workstation. The perturbation voltage of EIS tests was 5 mV and the frequency range from 100 mHz to 100 kHz.

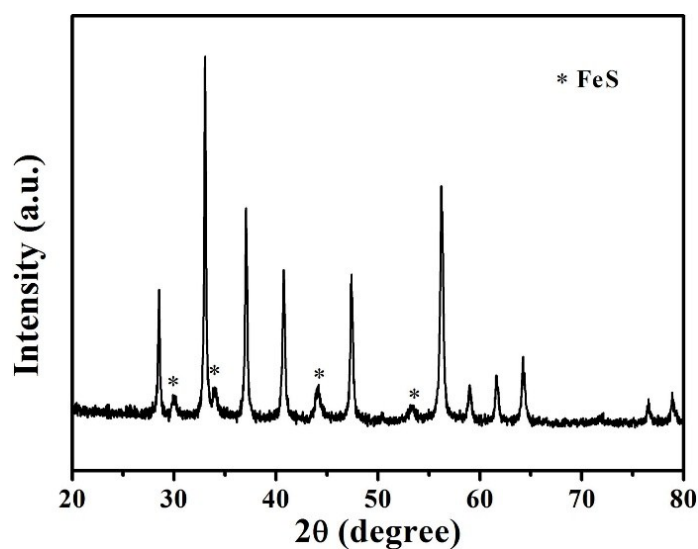

**Figure S1.** XRD pattern of  $\text{FeS}_2@\text{FeS}@C$  intermediate after annealing without pickled by HCl solution.

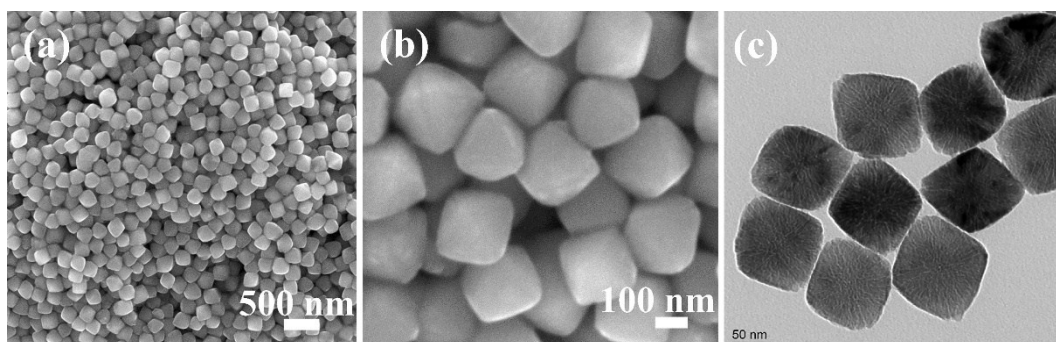

**Figure S2.** (a, b) SEM and TEM image of (c) neat FeS<sub>2</sub> nanooctahedra.

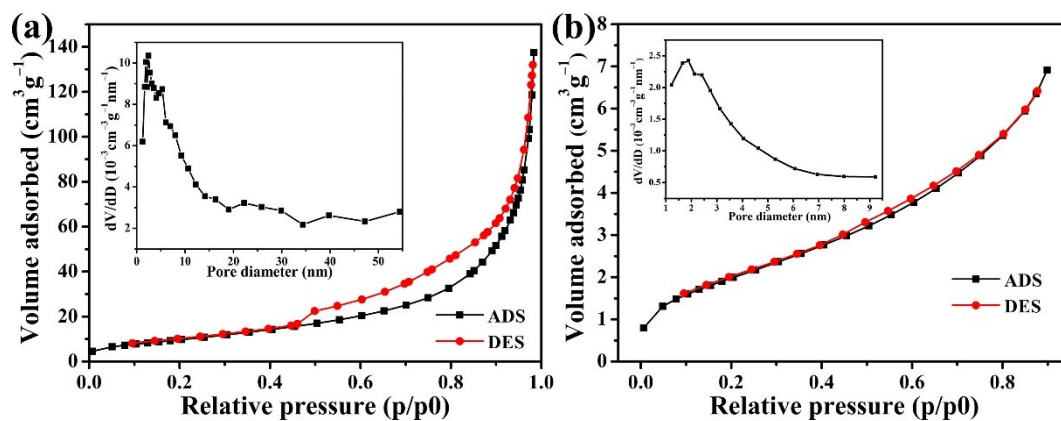

**Figure S3.** The isotherms of N<sub>2</sub> adsorption/desorption and the pore size distribution (the inset) of (a) FeS<sub>2</sub>@C nanooctahedra and (b) neat FeS<sub>2</sub> nanooctahedra.

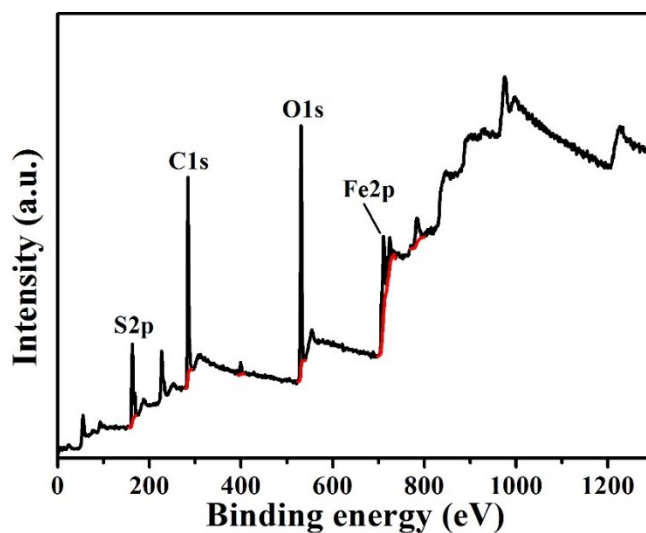

**Figure S4.** The survey XPS spectrum of FeS<sub>2</sub>@C nanooctahedra.

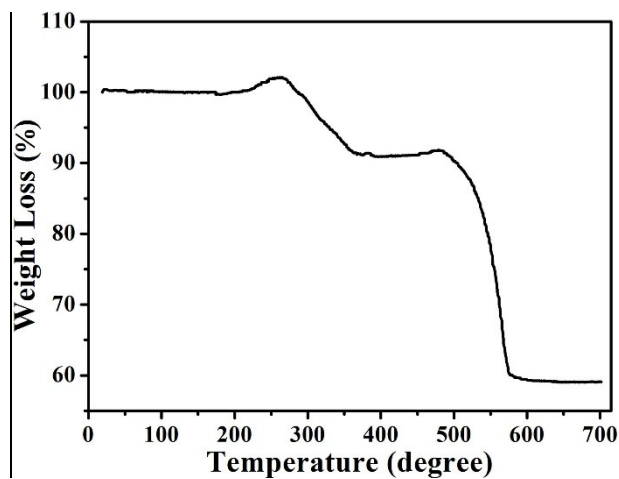

**Figure S5.** TG curve of FeS<sub>2</sub>@C nanooctahedra in air atmosphere.

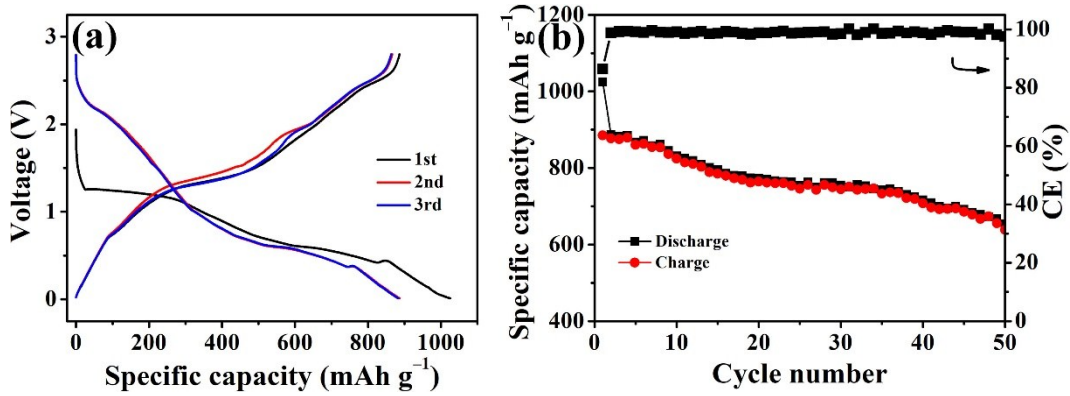

**Figure S6.** The discharge and charge curves of FeS<sub>2</sub>@C cathode for the first three cycles between 0.01–2.8 V at 0.1C; (c) cycling performance and CE of FeS<sub>2</sub>@C at the rate of 0.1C.

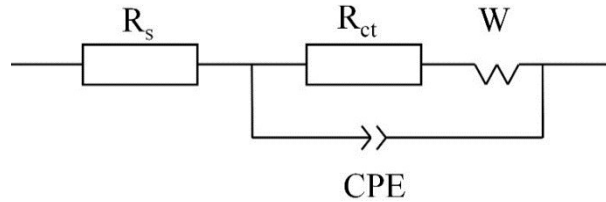

**Figure S7.** The parallel equivalent circuit model of EIS of both FeS<sub>2</sub> and FeS<sub>2</sub>@C electrodes after 50 cycling.

After 50 cycling, charge transfer resistance R<sub>ct</sub> of the FeS<sub>2</sub>@C electrode is significantly lower than that of the FeS<sub>2</sub> electrode (see Table S1), further demonstrating that the porous ultrathin-carbon-coated pyrite FeS<sub>2</sub>@C nanooctahedra reduces the internal resistance.

**Table S1** Summary of EIS fitting results.

| Sample                        | R <sub>s</sub> (Ω) | R <sub>ct</sub> (Ω) | W (Ω) |
|-------------------------------|--------------------|---------------------|-------|
| FeS <sub>2</sub> electrode    | 8.211              | 42.8                | 0.44  |
| FeS <sub>2</sub> @C electrode | 7.955              | 4.683               | 0.372 |

**Table S2** Comparison of the electrochemical performance of the herein presented carbon-coated pyrite FeS<sub>2</sub>@C nanooctahedra with previously reported results obtained with FeS<sub>2</sub>-based electrodes in SIBs.

| Types of materials | Long cycling performance | Rate capability | Voltage range | Ref. |
|--------------------|--------------------------|-----------------|---------------|------|
|--------------------|--------------------------|-----------------|---------------|------|

|                                                 |                                                                     |                                                       |            |                     |
|-------------------------------------------------|---------------------------------------------------------------------|-------------------------------------------------------|------------|---------------------|
| <b>Pyrite FeS<sub>2</sub></b>                   | 90% capacity retention after 20000 cycles at 1 A g <sup>-1</sup>    | 170 mA h g <sup>-1</sup> at 20 A g <sup>-1</sup>      | 0.8–3.0 V  | 1                   |
| <b>FeS<sub>2</sub>@C yolk-shell nanobox</b>     | 330 mA h g <sup>-1</sup> after 800 cycles at 2 A g <sup>-1</sup>    | 403 mA h g <sup>-1</sup> at 5 A g <sup>-1</sup>       | 0.1–2.0 V  | 2                   |
| <b>Pyrite (FeS<sub>2</sub>) NCs</b>             | 500 mA h g <sup>-1</sup> after 400 cycles at 1 A g <sup>-1</sup>    | 600 mA h g <sup>-1</sup> at 5000 mA g <sup>-1</sup>   | 0.02–2.5 V | 3                   |
| <b>FeS<sub>2</sub>/CNT-NN</b>                   | 309 mA h g <sup>-1</sup> after 1800 cycles at 1 A g <sup>-1</sup>   | 340 mA h g <sup>-1</sup> at 22 A g <sup>-1</sup>      | 0.8–3.0 V  | 4                   |
| <b>FeS<sub>2</sub> anode</b>                    | 87.8% capacity retention after 800 cycles at 200 mA g <sup>-1</sup> | 323 mA h g <sup>-1</sup> at 5 A g <sup>-1</sup>       | 0.5–3.0 V  | 5                   |
| <b>Cobalt-doped FeS<sub>2</sub> nanospheres</b> | 220 mA h g <sup>-1</sup> after 5000 cycles at 2 A g <sup>-1</sup>   | 172 mA h g <sup>-1</sup> even at 20 A g <sup>-1</sup> | 0.8–2.9 V  | 6                   |
| <b>FeS<sub>2</sub>/rGO-A</b>                    | 58.03% capacity retention after 800 cycles at 1C                    | 370 mA h g <sup>-1</sup> at 0.1C                      | 0.8–2.8 V  | 7                   |
| <b>FeS<sub>2</sub>@C nanorods</b>               | 99% capacity retention after 9000 cycles at 10 A g <sup>-1</sup>    | 140 mA h g <sup>-1</sup> at 20 A g <sup>-1</sup>      | 0.8-3.0 V, | 8                   |
| <b>FeS<sub>2</sub>@rGO</b>                      | 240.5 mA h g <sup>-1</sup> after 250 cycles at 0.5C                 | 303.8 mA h g <sup>-1</sup> at 0.1C                    | 0.8–3.0 V  | 9                   |
| <b>FeS<sub>2</sub>@C nanooctahedra</b>          | 89% capacity retention after 2000 cycles at 10C                     | 417 mA h g <sup>-1</sup> at 0.1C                      | 0.8–2.8 V  | <b>Present work</b> |

## References

- 1 Z. Hu, Z. Zhu, F. Cheng, K. Zhang, J. Wang, C. Chen and J. Chen, *Energy Environ. Sci.*, 2015, **8**, 1309-1316.
- 2 Z. Liu, T. Lu, T. Song, X.-Y. Yu, X. W. Lou and U. Paik, *Energy Environ. Sci.*, 2017, **10**, 1576-1580.
- 3 M. Walter, T. Zund and M. V. Kovalenko, *Nanoscale*, 2015, **7**, 9158-9163.
- 4 Y. Chen, X. Hu, B. Evanko, X. Sun, X. Li, T. Hou, S. Cai, C. Zheng, W. Hu and G. D. Stucky, *Nano Energy*, 2018, **46**, 117-127.
- 5 K. Chen, W. Zhang, L. Xue, W. Chen, X. Xiang, M. Wan and Y. Huang, *ACS Appl. Mater. Interfaces*, 2017, **9**, 1536-1541.
- 6 K. Zhang, M. Park, L. Zhou, G.-H. Lee, J. Shin, Z. Hu, S.-L. Chou, J. Chen and Y.-M. Kang, *Angew. Chem. Int. Ed.*, 2016, **55**, 12822-12826.
- 7 W. Chen, S. Qi, L. Guan, C. Liu, S. Cui, C. Shen and L. Mi, *J. Mater. Chem. A*, 2017, **5**, 5332-5341.
- 8 Z. Lu, N. Wang, Y. Zhang, P. Xue, M. Guo, B. Tang, Z. Bai and S. Dou, *Electrochim. Acta*, 2018, **260**, 755-761.
- 9 W. Chen, S. Qi, M. Yu, X. Feng, S. Cui, J. Zhang and L. Mi, *Electrochim. Acta*, 2017, **230**, 1-9.
